# Supplementary material for: CNT serial copper-phenylacetylide to construct high-speed charge transfer/separation channels for effective photocatalytic degradation of PAHs
Source: Royal Society of Chemistry journal article supplement (doi:10.1039/d5dt01783a), 2025-01-01
Supplement: d5dt01783a1.pdf [file d5dt01783a1.pdf]

## Supporting Information

### CNT serial copper-phenylacetylide to construct high-speed charge transfer/separation channels for effective photocatalytic degradation of PAHs

Hui-Ying Sun,<sup>a\*</sup> Yue-Ying Xu<sup>a</sup>, Bai-Ling Liu,<sup>a\*</sup> Hua-Qiao Tan<sup>b\*</sup>

<sup>a</sup> School of Chemistry and Environmental Engineering, Jilin Provincial Science and Technology Innovation Center of Optical Materials and Chemistry, Jilin Provincial International Joint Research Center of Photo functional Materials and Chemistry, Changchun University of Science and Technology, Changchun, 130022, China

<sup>b</sup> Key Laboratory of Polyoxometalate and Reticular Material Chemistry of Ministry of Education, Faculty of Chemistry, Northeast Normal University, Changchun, 130024, P. R. China

\* Corresponding author:

E-mail: sunhuiying@cust.edu.cn; [liubl563@cust.edu.cn](mailto:liubl563@cust.edu.cn); [tanhq870@nenu.edu.cn](mailto:tanhq870@nenu.edu.cn)

### Table of Contents

|                                                                                      |    |
|--------------------------------------------------------------------------------------|----|
| 1. Experimental Procedures .....                                                     | 2  |
| 1.1 Characterization .....                                                           | 2  |
| 1.2 Materials .....                                                                  | 2  |
| 1.3 Electrochemical impedance spectroscopy (EIS) and photocurrent measurements ..... | 2  |
| 1.4 Electron paramagnetic resonance (EPR) test .....                                 | 3  |
| 1.5 Evaluation methods of photocatalytic PAHs degradation .....                      | 3  |
| 1.6 Computational Details .....                                                      | 4  |
| 2. Results and Discussion .....                                                      | 5  |
| 2.1 Supplementary Figures 1 to 19 .....                                              | 5  |
| 2.2 Supplementary Tables 1 to 6 .....                                                | 24 |
| 3. References .....                                                                  | 35 |

## **1. Experimental Procedures**

### **1.1 Characterization**

Powder X-ray diffraction (XRD) patterns were gathered on a Bruker AXS D8 Focus with filtered Cu K $\alpha$  radiation ( $\lambda = 1.54056 \text{ \AA}$ ). The scanning electron microscope (SEM) images were acquired using the JEOL JSM 4800F SEM. Transmission electron microscopy (TEM), High-resolution images (HRTEM) and element maps were studied on a JEOL-2100F microscope with a 200 kV acceleration voltage. X-ray photoelectron spectroscopy (XPS) was recorded on ESCALABMKII spectrometer, using Al-K $\alpha$  as achromatic X-ray source. UV-vis diffuse reflectance spectrum (DRS) was obtained by UV-2600 UV-Vis Spectrophotometer (Shimadzu) in which BaSO $_4$  as a reference sample. The N $_2$  adsorption-desorption isotherms were determined at 77 K by using a Quantachrome Autosorb iQ apparatus. Photoluminescence (PL) spectra were recorded by a high-resolution FLS 920 spectrofluorometer (Edinburgh Instruments). The electron paramagnetic resonance (EPR) measurements were carried out on a JEOL JES-FA200 spectrometer. The total organic carbon test was conducted on a German-analytikjena-multi N/C 3100.

### **1.2 Materials**

CuCl $_2 \cdot 2\text{H}_2\text{O}$  (AR), methanol (99.7%), triethylamine (99%), phenylacetylene (98%), 1,4-diethynylbenzene (98%), ethanol (99.9%) were purchased from Shanghai Macklin Biochemical Technology Co., Ltd. Benzylamine and its derivatives, benzyl alcohol, thioanisole and acetonitrile were purchased from Aladdin Chemical Co., Ltd. All the chemicals were used as received without further purification.

CuCl $_2 \cdot 2\text{H}_2\text{O}$  (99.7%), methanol (99.7%), ethanol (99.5%), triethylamine (99%), phenylacetylene (98%), amino-modified CNT (>95%), naphthalene (99.7%), phenanthrene (97%) and pyrene (97%) were purchased from Shanghai Macklin Biochemical Technology Co., Ltd. All the chemicals were used as received without further purification.

### **1.3 Electrochemical impedance spectroscopy (EIS) and photocurrent measurements**

All electrochemical tests were carried out by using a CHI660E workstation and performed at room temperature under atmospheric pressure. For EIS and photocurrent measurements, three electrode standard system was prepared in a quartz cell firstly. Pt plate, Ag/AgCl electrode and fluorine-doped tin oxide (FTO) glass deposited with samples were used as the counter electrode, the reference electrode and the working electrode respectively, and 0.1 M Na<sub>2</sub>SO<sub>4</sub> aqueous solution was adopted as the electrolyte. Importantly, working electrode was prepared as follows: first, disperse 20 mg of the catalyst in 2 mL of absolute ethanol solution with 2.5% nafion to obtain a uniformly turbid liquid by ultrasonication for half an hour. Then, dropped the suspension was drip-coated on a 1 × 3 cm<sup>2</sup> FTO glass substrate to ensure the active area of the catalyst was about 2 cm<sup>2</sup>. In the end, the obtained working electrode was dried at room temperature. For EIS experiments, frequency was set from 0.01 Hz to 10 kHz at 0 V sinusoidal ac-perturbation. A 300 W (CELHXF300, AULIGHT) xenon lamp with different bands monochromatic light was selected to carry out the photocurrent measurement. In order to reduce the effect of the experiments, the light source was irradiated from the back of the FTO.

#### **1.4 Electron paramagnetic resonance (EPR) test**

The EPR spectra of the samples were measured in the presence of 5,5-dimethyl-1-pyrroline N-oxide (DMPO). Before to determine the superoxide radicals (DMPO-·O<sub>2</sub><sup>-</sup>) and hydroxyl radical (DMPO-·OH), 10.0 mg samples were dissolved in 0.5 mL methanol and water respectively, and then 50 mL DMPO was added with ultrasonic dispersion for 5 min. After irradiated for 3 min under visible light, the solution was subjected to analysis at room temperature. The typical signal of DMPO-·O<sub>2</sub><sup>-</sup> and DMPO-·OH adducts indicate the generation of ·O<sub>2</sub><sup>-</sup> and ·OH.

#### **1.5 Evaluation methods of photocatalytic PAHs degradation**

10 mg of photocatalyst was suspended in 20 mL of phenanthrene (PHE) aqueous solution (C<sub>PHE</sub> = 5.6 × 10<sup>-5</sup> M). After continuous stirring in the dark for 30 min to establish adsorption equilibrium, this system was exposed to visible light to initiate the photocatalytic reaction. A

300 W xenon lamp was used as the visible-light source. The photocatalysis system was cooled by circulating water and kept at 20 °C. Subsequently, 1 mL of the suspension was extracted every 5 min and filtered with filter membranes (aquo system) to remove the suspended catalyst. The absorbance of PHE was measured using a UV spectrophotometer in the characteristic 245 nm band. The degradation intermediates were extracted and analyzed using a GC-MS system equipped with 19091J-413 column (30 m × 0.32 mm). The chromatographic conditions were set with helium as the carrier gas at a flow rate of 1 mL/min, split less injection with an injection volume of 2 µL, and an injection temperature of 300 °C. The oven temperature was initially set at 60 °C and held for 1 min, then ramped up to 300 °C at a rate of 5 °C/min and held for 5 min. The photocatalytic degradation performance evaluation of naphthalene and pyrene is consistent with PHE.

## 1.6 Computational Details

All first-principles calculations were performed within the framework of DFT using the plane-wave pseudopotential approach as implemented in the Vienna Ab-initio Simulation Package (VASP) code<sup>[1-3]</sup>. The charge analysis of the catalyst was carried out using the Bader charge population method. A plane-wave basis set with a cutoff energy of 400 eV and a Monkhorst-Pack scheme with a Gamma centered k-point were adopted in our calculations. The convergence standards of energy and force were selected as 10<sup>-4</sup> eV and 0.03 eV/Å, respectively. In the reactive oxygen species calculation section, the formula for calculating oxygen adsorption energy is  $E_{\text{ads}} = E_{\text{total}} - E_{\text{cat.}} - E_{\text{oxygen molecule}}$  ( $E_{\text{oxygen molecule}} = -9.85$  eV).

## 2. Results and Discussion

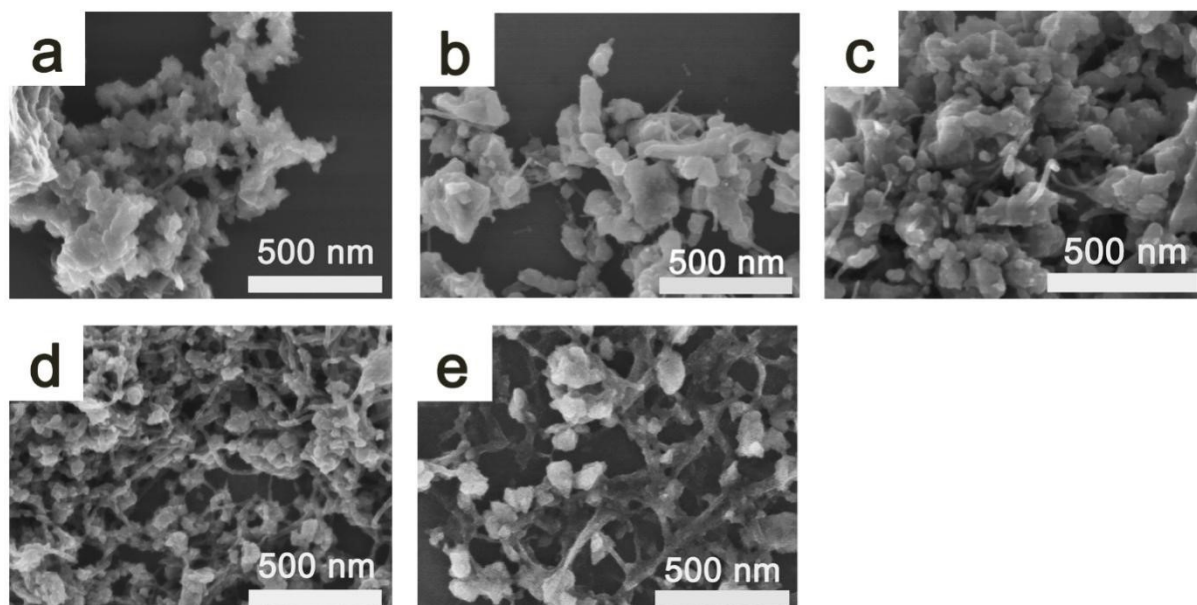

**Figure S1.** SEM images of (a) 1 wt% CNT-P, (b) 3 wt% CNT-P, (c) 5 wt% CNT-P, (d) 10 wt% CNT-P and (e) 15 wt% CNT-P.

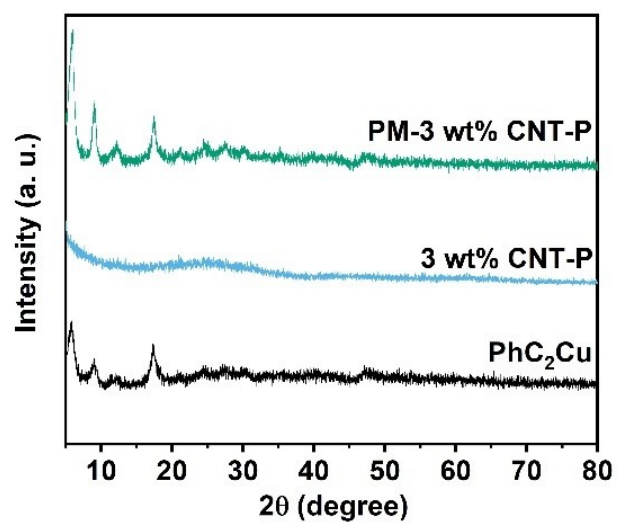

**Figure S2.** Powder XRD pattern of the samples.

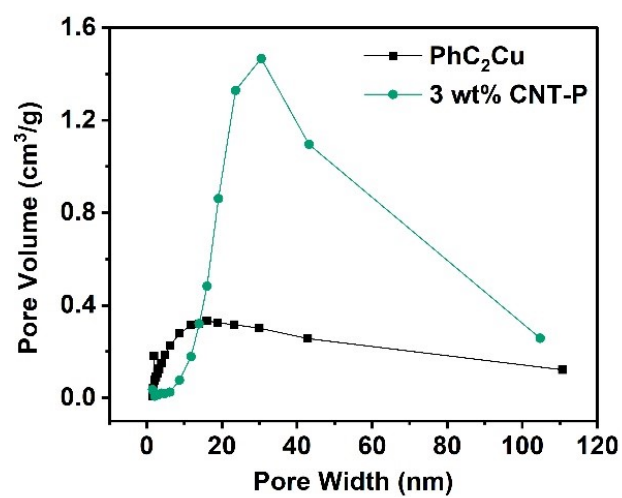

**Figure S3.** The pore size distribution of the samples.

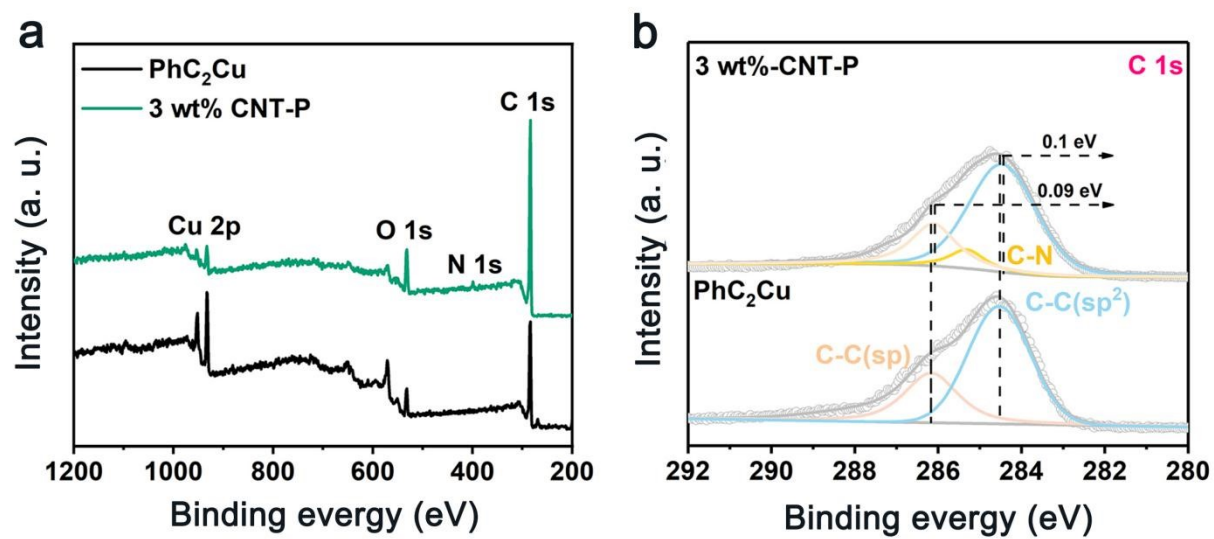

**Figure S4.** (a) XPS survey spectrum and (b) High-resolution XPS of C 1s spectra of the samples.



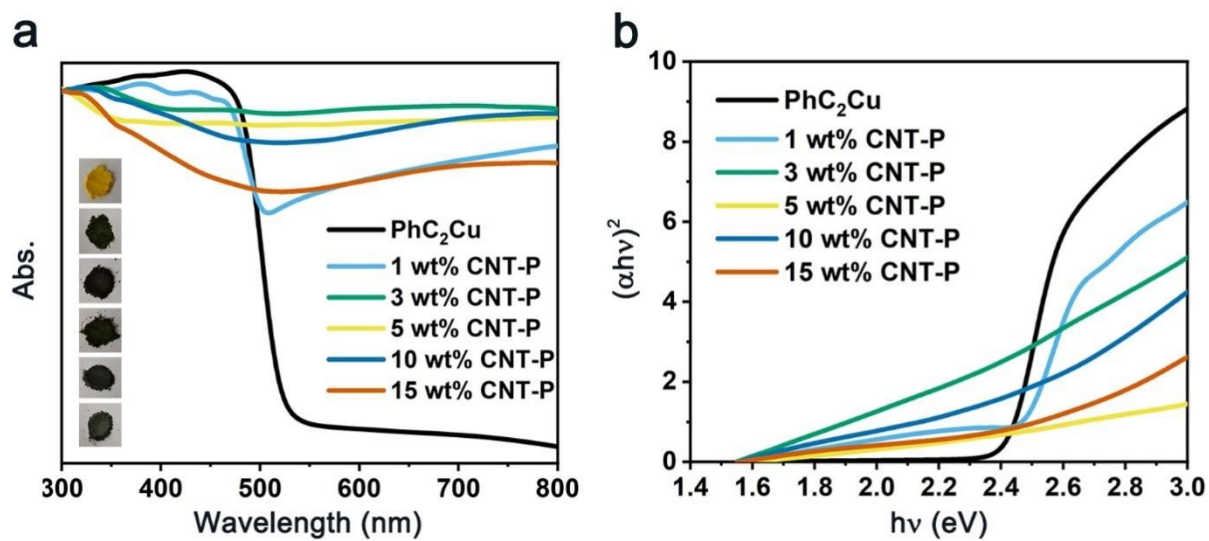

**Figure S5.** (a) Diffuse reflectance spectra (inset: the optical photos) and (b) The band gap energies transformed by Kubelka-Munk function of the samples.

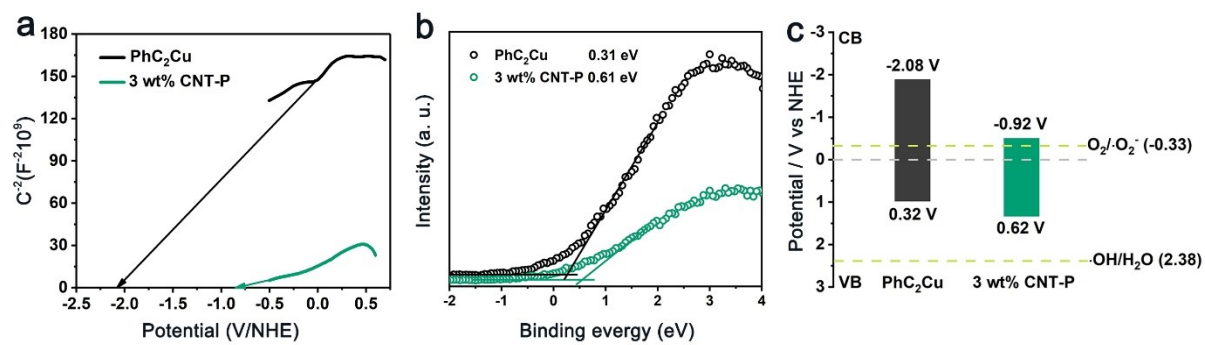

**Figure S6.** (a) Mott-Schottky plots, (b) VB-XPS and (c) Energy level of the samples.

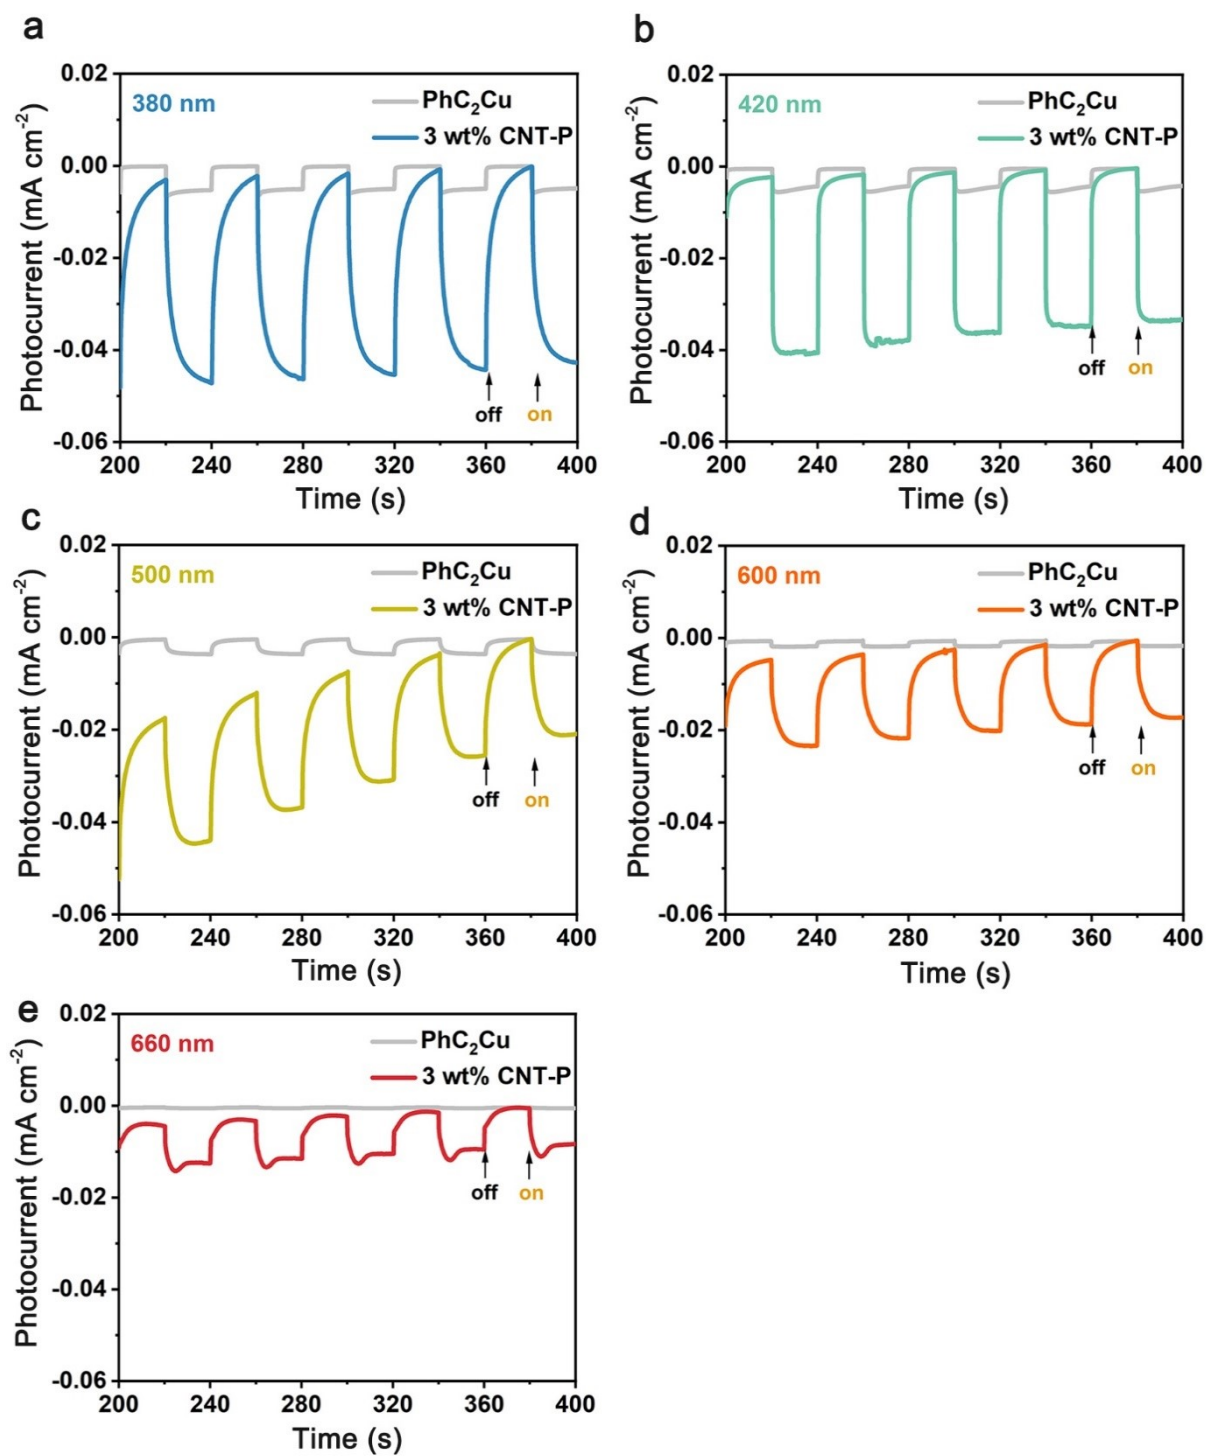

**Figure S7.** Transient photocurrents of the samples at different wavelength bands.

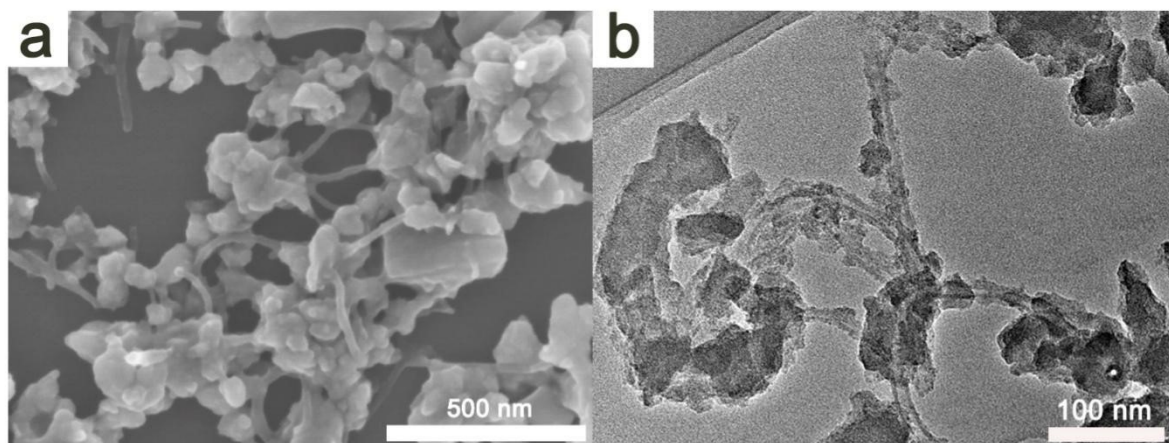

**Figure S8.** (a) SEM and (b) TEM images of 3 wt% CNT-P after photocatalytic PHE degradation.

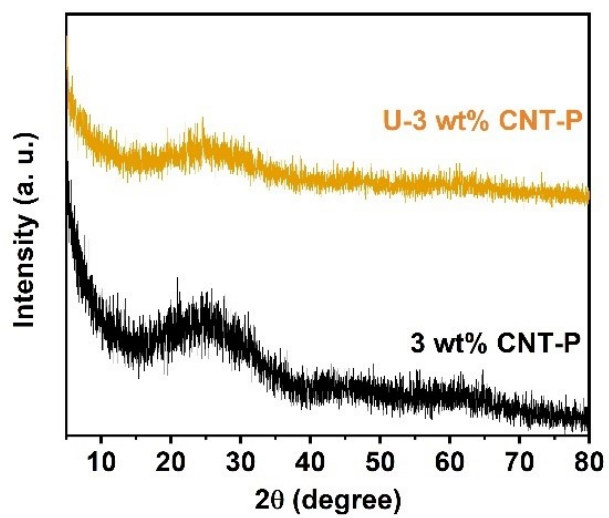

**Figure S9.** XRD spectra of the samples before and after the photocatalytic PHE degradation.

The catalyst after circulation is marked as U-3 wt% CNT-P.

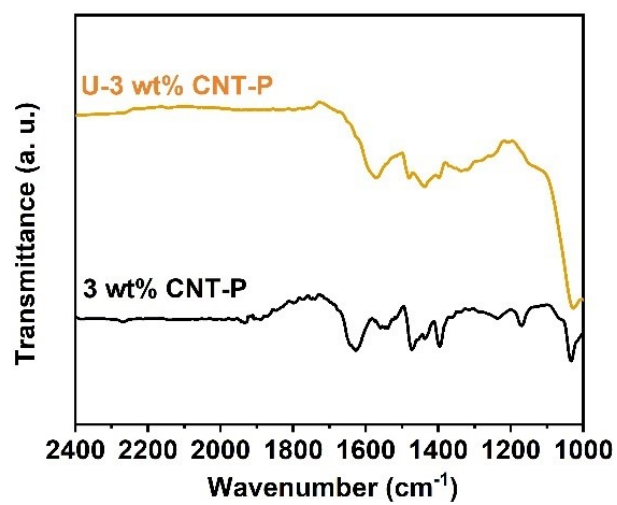

**Figure S10.** FTIR spectra of the samples before and after the photocatalytic PHE degradation.

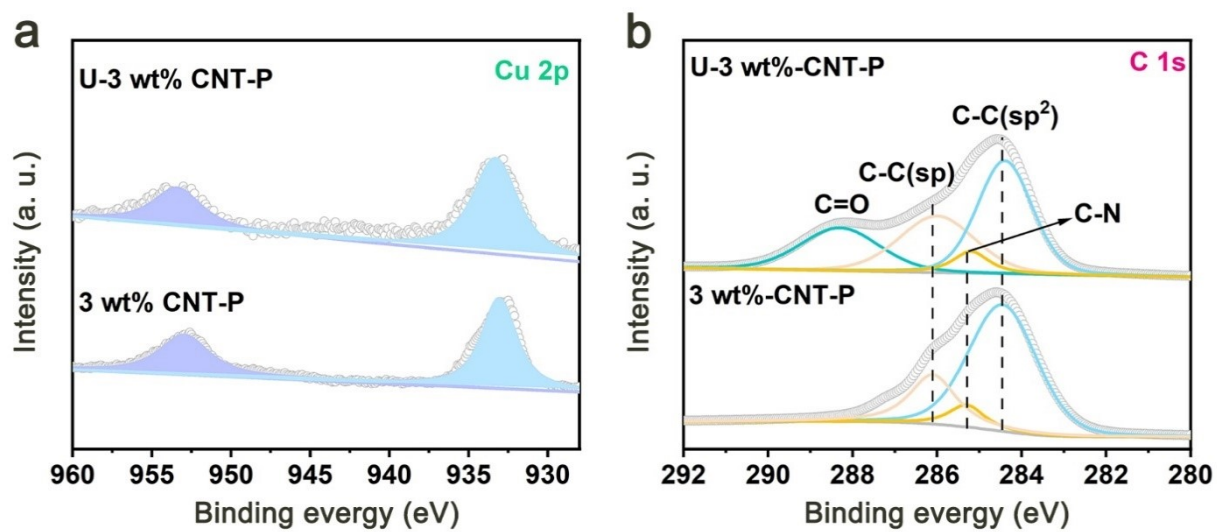

**Figure S11.** (a) Cu 2p and (b) C1s XPS spectra of the samples before and after the photocatalytic PHE degradation. The signal peak at 288.3 eV is attributed to residual degradation products.<sup>[4]</sup>

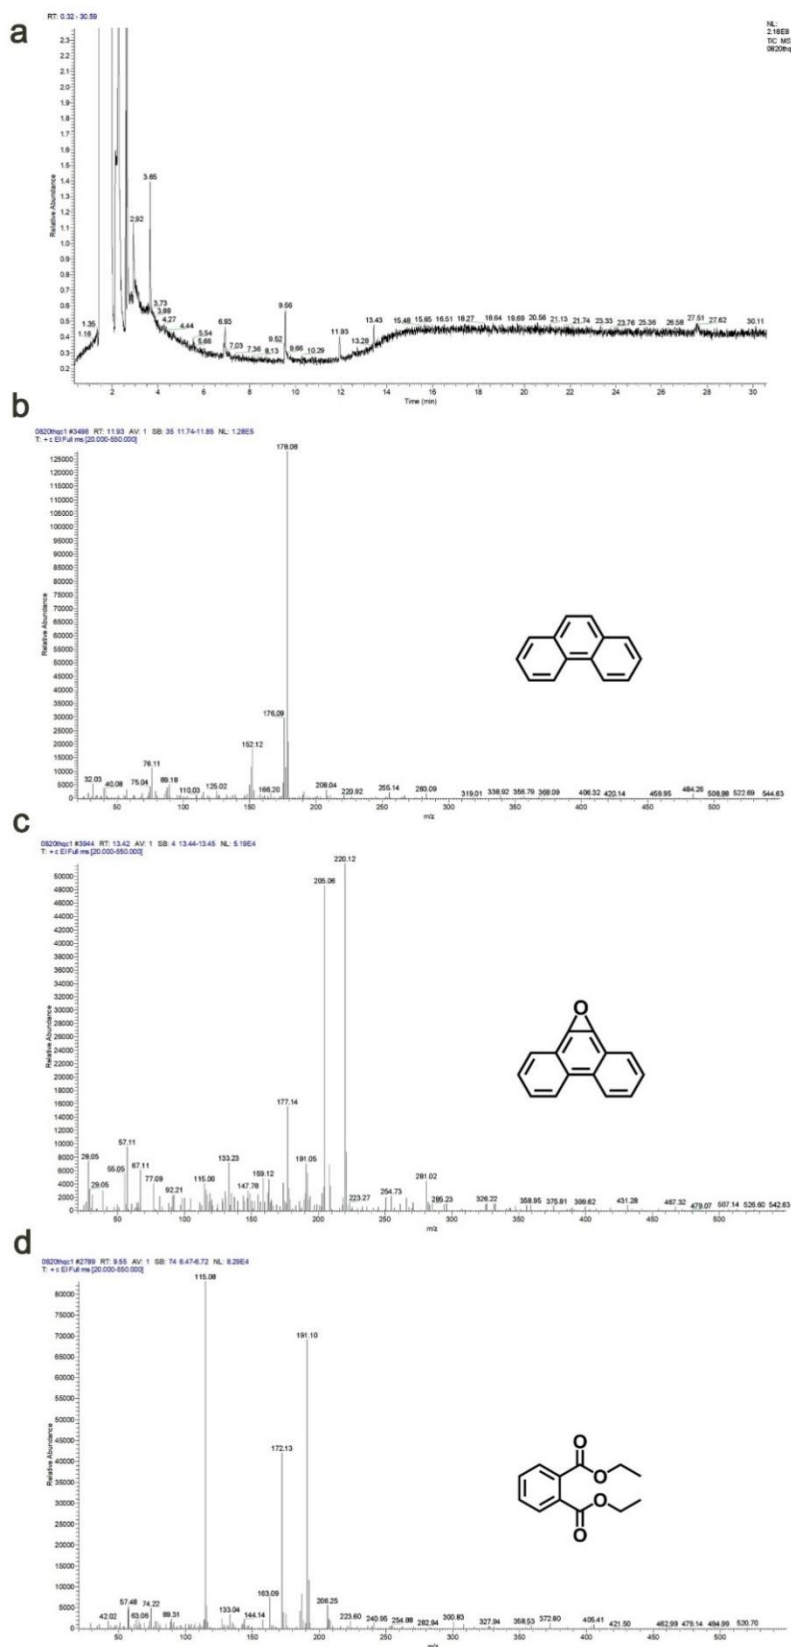

**Figure S12.** The main intermediate products generated during the process of photocatalytic PHE degradation by 3 wt% CNT-P.



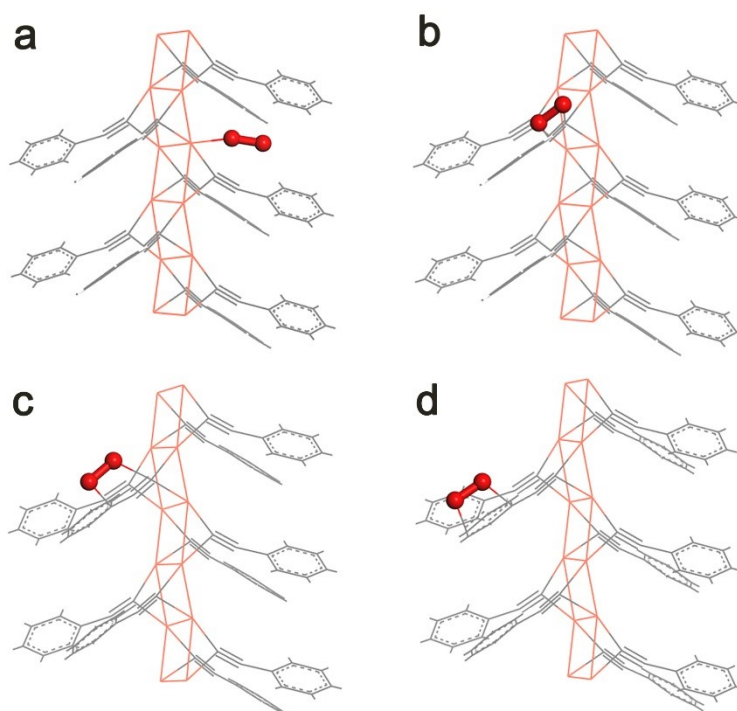

**Figure S13.** Schematic diagram of oxygen adsorption models at different sites of  $\text{PhC}_2\text{Cu}$ . In structural model, the gray, white, orange and red spheres represent C, H, Cu and O respectively. Oxygen molecules were dissociated at the adsorption site in Models b-d.

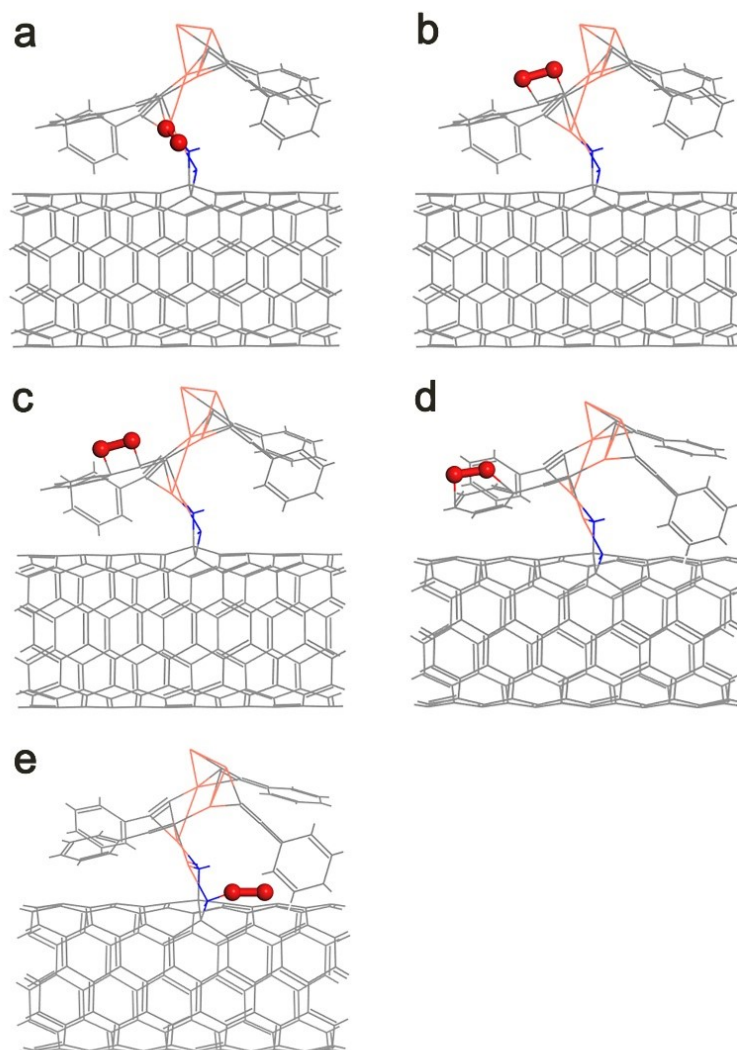

**Figure S14.** Schematic diagram of oxygen adsorption models at different sites of 3 wt% CNT-P. In structural model, the gray, white, orange and red spheres represent C, H, Cu and O respectively. Oxygen molecules were dissociated at the adsorption site in Models b-d. Oxygen molecules cannot adsorb at these positions in Models e after optimization.

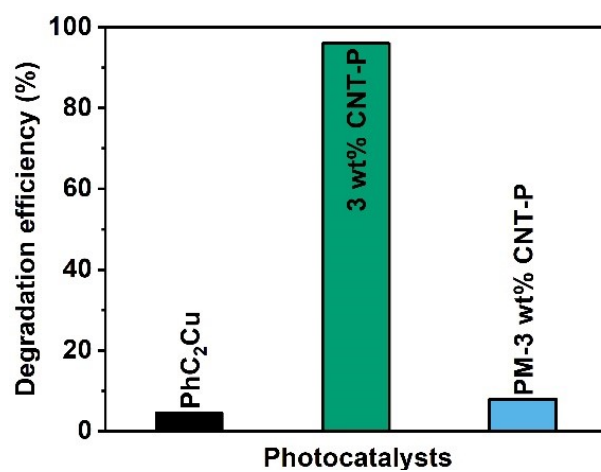

**Figure S15.** Degradation efficiency of naphthalene (100 ppm) by x wt% CNT-P with 70 min irradiation time.

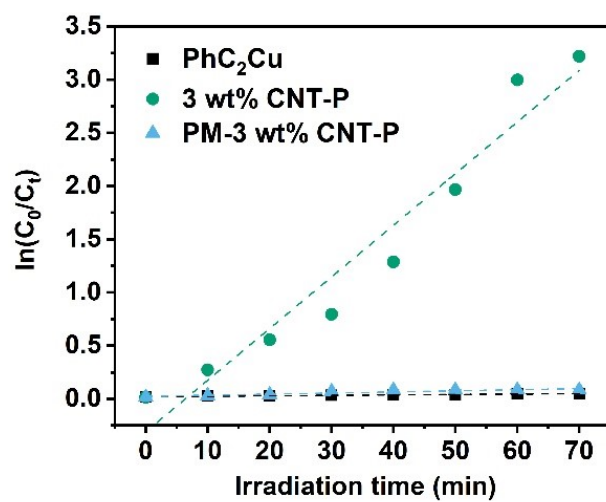

**Figure S16.** Kinetic linear fitting curves of photocatalytic naphthalene degradation by x wt% CNT-P.

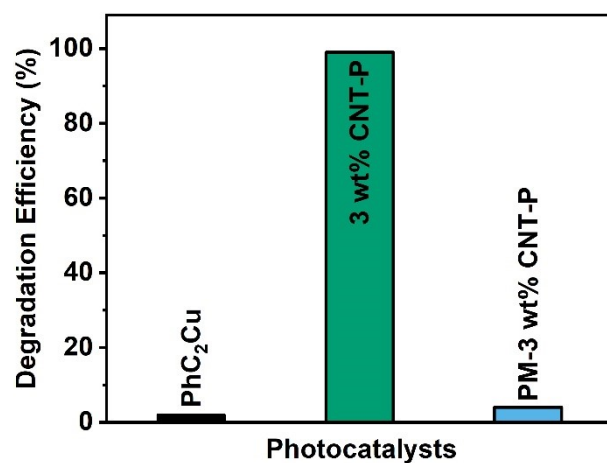

**Figure S17.** Degradation efficiency of pyrene by x wt% CNT-P with 50 min irradiation time.

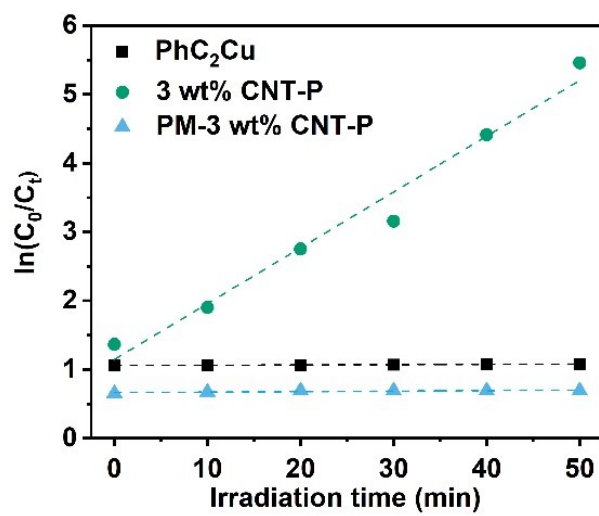

**Figure S18.** Kinetic linear fitting curves of photocatalytic pyrene degradation by x wt% CNT-P.

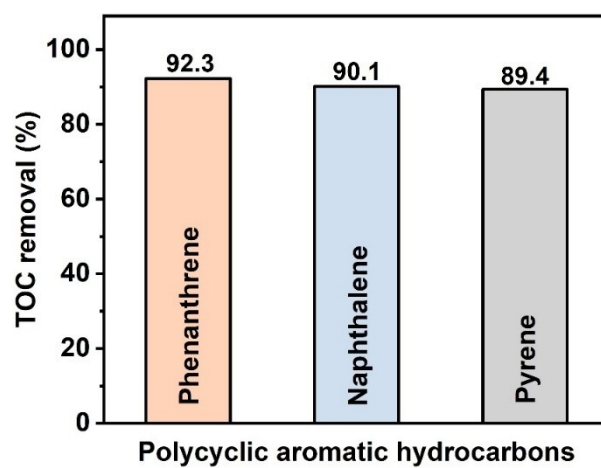

**Figure S19.** Total organic carbon (TOC) of different samples.

**Table S1** EDX element analysis of x wt% CNT-P.

| Samples              | Element | Percentage by weight % | Percentage by atoms % |
|----------------------|---------|------------------------|-----------------------|
| NH <sub>2</sub> -CNT | C K     | 99.52                  | 99.59                 |
|                      | N K     | 0.48                   | 0.41                  |
| PhC <sub>2</sub> Cu  | C K     | 68.72                  | 92.11                 |
|                      | Cu K    | 31.28                  | 7.89                  |
| 1 wt% CNT-P          | C K     | 69.55                  | 91.8                  |
|                      | Cu K    | 29.76                  | 7.4                   |
|                      | N       | 0.69                   | 0.8                   |
|                      | C K     | 71.55                  | 92.4                  |
| 3 wt% CNT-P          | Cu K    | 27.56                  | 6.7                   |
|                      | N       | 0.89                   | 0.9                   |
|                      | C K     | 72.31                  | 92.7                  |
| 5 wt% CNT-P          | Cu K    | 26.94                  | 6.5                   |
|                      | N       | 0.75                   | 0.8                   |
|                      | C K     | 73.55                  | 93                    |
| 10 wt% CNT-P         | Cu K    | 25.75                  | 6.2                   |
|                      | N       | 0.7                    | 0.8                   |
|                      | C K     | 74.31                  | 93.4                  |
| 15 wt% CNT-P         | Cu K    | 24.96                  | 5.9                   |
|                      | N       | 0.73                   | 0.7                   |



**Table S2** The conversion rate of the Glaser coupling reaction of the sample under light exposure.

| 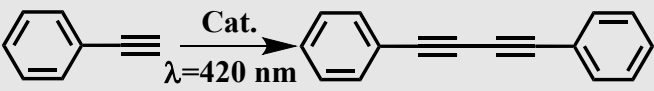 |                     |           |                   |
|------------------------------------------------------------------------------------|---------------------|-----------|-------------------|
| Entry                                                                              | Cat.                | Conv. [%] | Sel. [%]          |
| 1                                                                                  | PhC <sub>2</sub> Cu | 13        | >99               |
| 2                                                                                  | 3 wt% CNT-P         | 7         | >99               |
| 3                                                                                  | 15 wt% CNT-P        | 23        | 72 <sup>[a]</sup> |

<sup>[a]</sup>The reason for the selective reduction being lowered was that another organic compound, diphenylacetylene, was detected in the system.

**Table S3** Optimized cell parameters and atomic coordinates of PhC<sub>2</sub>Cu.

|                                           |        |        |        |
|-------------------------------------------|--------|--------|--------|
| <b>Space Group: P2<sub>1</sub> (C2-2)</b> |        |        |        |
| <b>a = 15.45 Å      α = 90.00°</b>        |        |        |        |
| <b>b = 5.29 Å      β = 109.23°</b>        |        |        |        |
| <b>c = 10.28 Å      γ = 90.00°</b>        |        |        |        |
| <b>V = 793.22 Å<sup>3</sup></b>           |        |        |        |
| Cu1                                       | 0.5885 | 0.9706 | 0.6559 |
| Cu2                                       | 0.5632 | 0.5043 | 0.5651 |
| C1                                        | 0.9918 | 0.2106 | 0.7186 |
| C2                                        | 0.9327 | 0.1087 | 0.7831 |
| C3                                        | 0.8517 | 0.2366 | 0.7756 |
| C4                                        | 0.8287 | 0.4647 | 0.7017 |
| C5                                        | 0.8888 | 0.5647 | 0.6356 |
| C6                                        | 0.9701 | 0.4383 | 0.6463 |
| C7                                        | 0.7473 | 0.5984 | 0.6921 |
| C8                                        | 0.6761 | 0.7206 | 0.6781 |
| C9                                        | 0.3056 | 0.6958 | 0.8886 |
| C10                                       | 0.3090 | 0.5979 | 0.7638 |
| C11                                       | 0.3562 | 0.7303 | 0.6900 |
| C12                                       | 0.4013 | 0.9583 | 0.7420 |
| C13                                       | 0.3981 | 0.0549 | 0.8691 |
| C14                                       | 0.3492 | 0.9239 | 0.9401 |
| C15                                       | 0.4515 | 0.0927 | 0.6698 |
| C16                                       | 0.4972 | 0.2429 | 0.6212 |
| H1                                        | 0.0548 | 0.1111 | 0.7244 |
| H2                                        | 0.9518 | 0.9374 | 0.8450 |
| H3                                        | 0.8062 | 0.1602 | 0.8275 |
| H4                                        | 0.8689 | 0.7362 | 0.5742 |
| H5                                        | 0.0168 | 0.5180 | 0.5973 |
| H6                                        | 0.2696 | 0.5917 | 0.9469 |
| H7                                        | 0.2716 | 0.4259 | 0.7208 |
| H8                                        | 0.3571 | 0.6587 | 0.5909 |
| H9                                        | 0.4370 | 0.2245 | 0.9122 |
| H10                                       | 0.3458 | 0.9982 | 0.0374 |

**Table S4** Optimized cell parameters and atomic coordinates of 3 wt% CNT-P.

| <b>Space Group: P1 (C1-1)</b>    |                                      |        |        |
|----------------------------------|--------------------------------------|--------|--------|
| <b>a = 12.12 Å</b>               | <b><math>\alpha</math> = 84.99°</b>  |        |        |
| <b>b = 19.88 Å</b>               | <b><math>\beta</math> = 89.57°</b>   |        |        |
| <b>c = 8.48 Å</b>                | <b><math>\gamma</math> = 130.68°</b> |        |        |
| <b>V = 1537.32 Å<sup>3</sup></b> |                                      |        |        |
| C1                               | 0.8280                               | 0.3911 | 0.4607 |
| C2                               | 0.5976                               | 0.5193 | 0.4142 |
| C3                               | 0.3035                               | 0.9344 | 0.5868 |
| C4                               | 0.8294                               | 0.8200 | 0.5931 |
| C5                               | 0.7473                               | 0.2406 | 0.5013 |
| C6                               | 0.7743                               | 0.4910 | 0.4310 |
| C7                               | 0.0743                               | 0.2458 | 0.4541 |
| C8                               | 0.9163                               | 0.0829 | 0.4798 |
| C9                               | 0.0349                               | 0.8191 | 0.6234 |
| C10                              | 0.5563                               | 0.0774 | 0.5461 |
| C11                              | 0.3230                               | 0.3930 | 0.4329 |
| C12                              | 0.8270                               | 0.9300 | 0.5012 |
| C13                              | 0.7773                               | 0.4916 | 0.0985 |
| C14                              | 0.8311                               | 0.9303 | 0.1724 |
| C15                              | 0.3192                               | 0.3941 | 0.1000 |
| C16                              | 0.8292                               | 0.3911 | 0.1269 |
| C17                              | 0.0323                               | 0.8146 | 0.2920 |
| C18                              | 0.0764                               | 0.2462 | 0.1189 |
| C19                              | 0.3025                               | 0.9349 | 0.2541 |
| C20                              | 0.5879                               | 0.5016 | 0.0902 |
| C21                              | 0.5559                               | 0.0770 | 0.2128 |
| C22                              | 0.9151                               | 0.0827 | 0.1465 |
| C23                              | 0.7474                               | 0.2402 | 0.1681 |
| C24                              | 0.1888                               | 0.3272 | 0.1885 |
| C25                              | 0.8611                               | 0.0027 | 0.2425 |
| C26                              | 0.1707                               | 0.8737 | 0.3554 |
| C27                              | 0.4546                               | 0.4538 | 0.1749 |
| C28                              | 0.8188                               | 0.4497 | 0.1938 |
| C29                              | 0.4341                               | 0.0026 | 0.3172 |
| C30                              | 0.8246                               | 0.8611 | 0.2507 |
| C31                              | 0.9868                               | 0.1634 | 0.2158 |
| C32                              | 0.6634                               | 0.1581 | 0.2738 |
| C33                              | 0.7032                               | 0.5141 | 0.1751 |
| C34                              | 0.9033                               | 0.7688 | 0.3920 |
| C35                              | 0.8040                               | 0.3200 | 0.2297 |
| C36                              | 0.8156                               | 0.8603 | 0.4409 |
| C37                              | 0.7056                               | 0.5159 | 0.3383 |

|     |        |        |        |
|-----|--------|--------|--------|
| C38 | 0.8177 | 0.4489 | 0.3609 |
| C39 | 0.4331 | 0.0019 | 0.4841 |
| C40 | 0.8617 | 0.0040 | 0.4088 |
| C41 | 0.9098 | 0.7931 | 0.5463 |
| C42 | 0.4529 | 0.4504 | 0.3437 |
| C43 | 0.6627 | 0.1576 | 0.4405 |
| C44 | 0.9900 | 0.1651 | 0.3842 |
| C45 | 0.1779 | 0.3358 | 0.3589 |
| C46 | 0.1692 | 0.8720 | 0.5224 |
| C47 | 0.8029 | 0.3193 | 0.3969 |
| C48 | 0.4232 | 0.6317 | 0.1598 |
| C49 | 0.3668 | 0.6472 | 0.2601 |
| C50 | 0.3310 | 0.6861 | 0.3587 |
| C51 | 0.1871 | 0.6378 | 0.9231 |
| C52 | 0.1560 | 0.6752 | 0.0260 |
| C53 | 0.2678 | 0.7602 | 0.5672 |
| C54 | 0.4102 | 0.8100 | 0.4995 |
| C55 | 0.4423 | 0.7736 | 0.3955 |
| C56 | 0.8280 | 0.3911 | 0.9607 |
| C57 | 0.5976 | 0.5193 | 0.9142 |
| C58 | 0.3034 | 0.9344 | 0.0869 |
| C59 | 0.8294 | 0.8200 | 0.0930 |
| C60 | 0.7473 | 0.2406 | 0.0013 |
| C61 | 0.7743 | 0.4910 | 0.9310 |
| C62 | 0.0743 | 0.2458 | 0.9541 |
| C63 | 0.9163 | 0.0829 | 0.9798 |
| C64 | 0.0350 | 0.8191 | 0.1234 |
| C65 | 0.5563 | 0.0774 | 0.0461 |
| C66 | 0.3230 | 0.3930 | 0.9329 |
| C67 | 0.8270 | 0.9300 | 0.0012 |
| C68 | 0.7773 | 0.4916 | 0.5985 |
| C69 | 0.8311 | 0.9303 | 0.6724 |
| C70 | 0.3192 | 0.3941 | 0.6000 |
| C71 | 0.8292 | 0.3911 | 0.6269 |
| C72 | 0.0324 | 0.8146 | 0.7920 |
| C73 | 0.0764 | 0.2462 | 0.6189 |
| C74 | 0.3025 | 0.9349 | 0.7540 |
| C75 | 0.5879 | 0.5016 | 0.5902 |
| C76 | 0.5559 | 0.0770 | 0.7128 |
| C77 | 0.9151 | 0.0827 | 0.6465 |
| C78 | 0.7474 | 0.2402 | 0.6681 |
| C79 | 0.1888 | 0.3272 | 0.6885 |
| C80 | 0.8611 | 0.0027 | 0.7424 |
| C81 | 0.1707 | 0.8737 | 0.8553 |

|      |        |        |        |
|------|--------|--------|--------|
| C82  | 0.4546 | 0.4538 | 0.6749 |
| C83  | 0.8188 | 0.4497 | 0.6938 |
| C84  | 0.4341 | 0.0026 | 0.8172 |
| C85  | 0.8246 | 0.8611 | 0.7507 |
| C86  | 0.9868 | 0.1634 | 0.7158 |
| C87  | 0.6634 | 0.1581 | 0.7738 |
| C88  | 0.7032 | 0.5141 | 0.6751 |
| C89  | 0.9032 | 0.7687 | 0.8920 |
| C90  | 0.8040 | 0.3200 | 0.7297 |
| C91  | 0.8156 | 0.8603 | 0.9409 |
| C92  | 0.7056 | 0.5159 | 0.8383 |
| C93  | 0.8177 | 0.4489 | 0.8609 |
| C94  | 0.4331 | 0.0019 | 0.9841 |
| C95  | 0.8617 | 0.0041 | 0.9088 |
| C96  | 0.9098 | 0.7931 | 0.0463 |
| C97  | 0.4529 | 0.4504 | 0.8437 |
| C98  | 0.6627 | 0.1576 | 0.9405 |
| C99  | 0.9900 | 0.1651 | 0.8842 |
| C100 | 0.1779 | 0.3358 | 0.8589 |
| C101 | 0.1692 | 0.8720 | 0.0224 |
| C102 | 0.8029 | 0.3193 | 0.8969 |
| C103 | 0.4232 | 0.6317 | 0.6598 |
| C104 | 0.3668 | 0.6472 | 0.7601 |
| C105 | 0.3310 | 0.6861 | 0.8587 |
| C106 | 0.1871 | 0.6378 | 0.4231 |
| C107 | 0.1560 | 0.6751 | 0.5260 |
| C108 | 0.2678 | 0.7603 | 0.0672 |
| C109 | 0.4102 | 0.8101 | 0.9994 |
| C110 | 0.4423 | 0.7736 | 0.8954 |
| N1   | 0.1250 | 0.3890 | 0.3676 |
| N2   | 0.6284 | 0.6069 | 0.3746 |
| N3   | 0.1250 | 0.3890 | 0.8676 |
| N4   | 0.6285 | 0.6069 | 0.8746 |
| H1   | 0.1007 | 0.3859 | 0.4862 |
| H2   | 0.0266 | 0.3545 | 0.3182 |
| H3   | 0.7467 | 0.6712 | 0.8772 |
| H4   | 0.6074 | 0.6107 | 0.2576 |
| H5   | 0.1010 | 0.5708 | 0.8917 |
| H6   | 0.0448 | 0.6374 | 0.0774 |
| H7   | 0.4976 | 0.8768 | 0.5315 |
| H8   | 0.1007 | 0.3859 | 0.9862 |
| H9   | 0.0265 | 0.3545 | 0.8182 |
| H10  | 0.7467 | 0.6712 | 0.3772 |
| H11  | 0.6074 | 0.6108 | 0.7576 |

|     |        |        |        |
|-----|--------|--------|--------|
| H12 | 0.1010 | 0.5708 | 0.3916 |
| H13 | 0.0447 | 0.6374 | 0.5774 |
| H14 | 0.4976 | 0.8768 | 0.0314 |
| H15 | 0.2439 | 0.7862 | 0.6562 |
| H16 | 0.5536 | 0.8109 | 0.3448 |
| H17 | 0.2439 | 0.7863 | 0.1562 |
| H18 | 0.5536 | 0.8109 | 0.8447 |
| Cu1 | 0.2672 | 0.5144 | 0.2811 |
| Cu2 | 0.5123 | 0.6187 | 0.5063 |
| Cu3 | 0.2672 | 0.5144 | 0.7811 |
| Cu4 | 0.5123 | 0.6187 | 0.0063 |

---

**Table S5** Control experiment of photocatalytic degradation of naphthalene (10 ppm).

| Entry                   | Cat.        | Light | Atmosphere     | Scavengers                   | t[min] | Conv.[%] |
|-------------------------|-------------|-------|----------------|------------------------------|--------|----------|
| <b>1</b>                | No          | Yes   | Air            | -                            | 30     | 5        |
| <b>2</b>                | 3 wt% CNT-P | No    | Air            | -                            | 30     | 7        |
| <b>3</b>                | 3 wt% CNT-P | Yes   | N <sub>2</sub> | -                            | 30     | 6        |
| <b>4<sup>[a]</sup></b>  | 3 wt% CNT-P | Yes   | Air            | -                            | 30     | >99      |
| <b>5<sup>[b]</sup></b>  | 3 wt% CNT-P | Yes   | Air            | -                            | 30     | 95       |
| <b>6</b>                | 3 wt% CNT-P | Yes   | O <sub>2</sub> | -                            | 10     | >99      |
| <b>7<sup>[c]</sup></b>  | 3 wt% CNT-P | Yes   | Air            | e <sup>-</sup>               | 30     | 16       |
| <b>8<sup>[d]</sup></b>  | 3 wt% CNT-P | Yes   | Air            | h <sup>+</sup>               | 30     | 89       |
| <b>9<sup>[e]</sup></b>  | 3 wt% CNT-P | Yes   | Air            | ·O <sub>2</sub> <sup>-</sup> | 30     | 32       |
| <b>10<sup>[f]</sup></b> | 3 wt% CNT-P | Yes   | Air            | <sup>1</sup> O <sub>2</sub>  | 30     | 95       |
| <b>11<sup>[g]</sup></b> | 3 wt% CNT-P | Yes   | Air            | ·OH                          | 30     | 48       |

<sup>[a]</sup>Reaction conditions: substrate (10 ppm), catalyst (10 mg), H<sub>2</sub>O (20 mL). <sup>[b]</sup>Conversion rate after five cycles. [c-g] Na<sub>2</sub>S<sub>2</sub>O<sub>8</sub>, CH<sub>3</sub>OH, superoxide dismutase (SOD), β-carotene, and isopropanol were added respectively as were used as e<sup>-</sup>, h<sup>+</sup>, ·O<sub>2</sub><sup>-</sup>, <sup>1</sup>O<sub>2</sub>, and ·OH scavengers.

**Table S6** Photocatalytic PHE degradation on reported photocatalyst.

| Catalyst                                                                          | Experimental conditions                                                         | PAHs | Removal efficiency (%) | Ref. |
|-----------------------------------------------------------------------------------|---------------------------------------------------------------------------------|------|------------------------|------|
| A-BC/g-C <sub>3</sub> N <sub>4</sub> -D                                           | C <sub>PHE</sub> 1 mg/L, cat. 20 mg, high-pressure sodium lamp (250 W), 320 min | PHE  | 76.72                  | [5]  |
| N-doped ZnO-MoS <sub>2</sub>                                                      | C <sub>PHE</sub> 25 mg/L, cat. 100 mg, Xe lamp, 120 min                         | PHE  | 86.06                  | [6]  |
| TiO <sub>2</sub> /SiO <sub>2</sub> -800                                           | C <sub>PHE</sub> 0.5 mg/L, cat. 20 mg, Xe lamp (450 W), 180 min                 | PHE  | 88.00                  | [7]  |
| CeO <sub>2</sub> /FCN                                                             | C <sub>PHE</sub> 5 mg/L, cat. 20 mg, Hg lamp (1000 W), 60 min                   | PHE  | 96.60                  | [8]  |
| Carbon-doped zinc oxide                                                           | C <sub>PHE</sub> =0.2 mg/L, cat. 150 mg, UV lamp (15 W), 60 min                 | PHE  | 90.1                   | [9]  |
| Ag/rGO/BiOBr                                                                      | C <sub>PHE</sub> =0.6 mg/L, cat. 100 mg, Xe lamp (500 W), 300 min               | PHE  | 61.6                   | [10] |
| P-doped g-C <sub>3</sub> N <sub>4</sub> /BiOBr                                    | C <sub>PHE</sub> =1 mg/L, cat. 10 mg, Xe lamp (300 W), 60 min                   | PHE  | 99.6                   | [11] |
| Mn <sub>3</sub> O <sub>4</sub> /MnO <sub>2</sub> -Ag <sub>3</sub> PO <sub>4</sub> | C <sub>PHE</sub> =10 mg/L, Xe lamp, 100 min                                     | PHE  | 96.2                   | [12] |
| TiO <sub>2</sub> /titanate nanotube                                               | C <sub>PHE</sub> =20 mg/L, cat. 20 mg, Xe lamp, 240 min                         | PHE  | 95                     | [13] |



|                                                              |                                                                                                                 |     |      |                  |
|--------------------------------------------------------------|-----------------------------------------------------------------------------------------------------------------|-----|------|------------------|
| 3 wt% CNT-P                                                  | C <sub>PHE</sub> =10 mg/L, cat. 10 mg,<br>Xe lamp (300 W), 60 min                                               | PHE | 99   | <b>This work</b> |
| ZnO/Ag/GO                                                    | C <sub>NAP</sub> =50 mg/L, cat. 250<br>mg/L, visible light, 50 min                                              | NAP | 92   | [14]             |
| TiO <sub>2</sub> /AC                                         | C <sub>NAP</sub> =30 mg/L, cat. 400<br>mg/L, visible light, 120 min                                             | NAP | 93.5 | [15]             |
| N-TiO <sub>2</sub> /ACS-PVP                                  | C <sub>NAP</sub> =15 mg/L, cat. 100<br>mg/L, visible light, 100 min                                             | NAP | 86   | [16]             |
| FeMn/biochar                                                 | C <sub>NAP</sub> =30 mg/L, cat. 1000<br>mg/L, H <sub>2</sub> O <sub>2</sub> (100 mM),<br>visible light, 148 min | NAP | 82.2 | [17]             |
| Bi <sub>2</sub> MoO <sub>6</sub> /rGO                        | C <sub>NAP</sub> =50 mg/L, cat. 300<br>mg/L, visible light, 60 min                                              | NAP | 95   | [18]             |
| Fe <sub>3</sub> O <sub>4</sub>                               | C <sub>NAP</sub> =20 mg/L, cat. 500<br>mg/L, 480 min                                                            | NAP | 74.3 | [19]             |
| CeVO <sub>4</sub>                                            | C <sub>NAP</sub> =30 mg/L, cat. 250<br>mg/L, visible light, 300 min                                             | NAP | 95.1 | [20]             |
| 3 wt% CNT-P                                                  | C <sub>NAP</sub> =100 mg/L, cat. 10<br>mg, Xe lamp (300 W), 70<br>min                                           | NAP | 96   | <b>This work</b> |
| GO-<br>Fe <sub>3</sub> O <sub>4</sub> @SiO <sub>2</sub> @CdS | C <sub>PYR</sub> =100 mg/L, cat. 0.1<br>g/L, 120 min                                                            | PYR | 93.4 | [21]             |
| Ag <sub>3</sub> PO <sub>4</sub> /MoS <sub>2</sub>            | C <sub>PYR</sub> =1100 ug/L, cat. 0.5<br>g/L, 120 min                                                           | PYR | 99.4 | [22]             |
| 3D printed PLA-                                              | C <sub>PYR</sub> =0.44-3.15 ug/L, UV-                                                                           | PYR | >94  | [23]             |

|                                          |                                                                   |     |       |      |                      |
|------------------------------------------|-------------------------------------------------------------------|-----|-------|------|----------------------|
| TiO <sub>2</sub> composite               | light, 24 h                                                       |     |       |      |                      |
| Pt/TiO <sub>2</sub> /SiO <sub>2</sub>    | C <sub>PYR</sub> =5×10 <sup>-8</sup> M, UV-light,<br>10-110 min   | PYR | 81.4  | [24] |                      |
| TiO <sub>2</sub> /quartz fibre<br>filter | C <sub>PYR</sub> =9.3-196 ng/filter,<br>UV-light, 24 h            | PYR | 54    | [25] |                      |
| PAM/ZnO                                  |                                                                   |     |       |      |                      |
| PolyHIPE<br>hydrogel                     | C <sub>PYR</sub> =0.17-113.03 ug/L,<br>UV-light, 6 h              | PYR | 66.74 | [26] |                      |
| composite bead                           |                                                                   |     |       |      |                      |
| 3 wt% CNT-P                              | C <sub>PYR</sub> =10 mg/L, cat. 10 mg,<br>Xe lamp (300 W), 50 min | PYR | 99    |      | <b>This<br/>work</b> |

---

## References

1. F. Kresse, *Phys. Rev. B.*, 1996, **54**, 11169-11186.
2. J. P. Perdew, A. Ruzsinszky, G. I. C. Csonka, O. A. V. Vydrov, G. E. S. Scuseria, L. A. C. Constantin, X. L. Zhou, K. Burke, *Phys. Rev. Lett.*, 2008, **100**, 136406-136409.
3. J. Heyd, G. E. Scuseria, *J. Chem. Phys.*, 2003, **118**, 8207-8215.
4. H. Y. Jiang, P. Zhou, Y. Y. Wang, R. Duan, C. C. Chen, W. J. Song, J. C. Zhao, *Adv. Mater.*, 2016, **28**, 9776-9781.
5. M. Lin, F. Li, W. Cheng, X. Rong, W. Wang, *Chemosphere*, 2022, **288**, 132620-132629.
6. H. A. Chauhan, M. Rafatullah, K. A. Ali, M. F. Umar, M. A. Khan, B. H. Jeon, *J. Water Process. Eng.*, 2022, **47**, 102714-102716.
7. H. Ji, W. Liu, F. Sun, T. Huang, L. Chen, Y. Liu, J. Qi, C. Xie, D. Zhao, *Chem. Eng. J.*, 2021, **419**, 129605-129618.
8. C. J. Feng, J. Rong, Y. Z. Zhang, X. D. Zheng, X. Z. Li, S. Xu, Z. Y. Li, *Appl. Catal. B: Environ.*, 2023, **337**, 123005-123017.
9. Y. Shaban, N. A. Alharbi, *Environ. Sci. Pollut. Res.*, 2022, **29**, 47818-47831.
10. J. Zhao, W. Tian, M. Chu, H. Chen, S. Yang, J. Jiang, *Chemosphere*, 2022, **297**, 134175-134184.
11. Y. Feng, Y. Tao, J. H. Qu, Y. Zhang, *Chem. Eng. J.*, 472 2023, **472**, 145053-145068.
12. H. Y. Cai, L. Sun, Y. M. Wang, T. W. Song, M. T. Bao, L. X. Yang, *Chem. Eng. J.*, 2019, **369**, 1078-1092.
13. X. Zhao, Z. Q. Cai, T. Wang, S. E. O'Reilly, W. Liu, D. Y. Zhao, *Appl. Catal. B: Environ.*, 2016, **187**, 134-143.
14. N. Mukwevho, R. Gusain, E. Fosso-Kankeu, N. Kumar, F. Waanders, S. S. Ray, *J. Ind. Eng. Chem.*, 2020, **81**, 393-404.
15. D. Liu, Z. Wu, F. Tian, B.C. Ye, Y. Tong, *J. Alloy. Compd.*, 2016, **676**, 489-498.

16. E. H. Doabi, F. Elmi, M. M. Elmi. *J. Photochem. Photobiol. A Chem.*, 2022, **425**, 113677.
17. L. Li, et al. *Water Res*, 2019, **160**, 238-248.
18. F. Li, M. Lin. *Int. J. Environ. Res. Public Health*, 2020, **17**, 2065.
19. J. Zhang, S. Fan, B. Lu, Q. Cai, J. Zhao, S. Zang. *R. Soc. Open Sci.*, 2019, **6**, 181779.
20. G. Lu, B. Song, Z. Li, H. Liang, X. Zou. *Chem. Eng. J.*, 2020, **402**, 125645.
21. T. Li, M. Wang, Y. Hao. *Sci. Total Environ.*, 2023, **857**, 159254.
22. Y. Wang, W. Feng, A. Gong, W. Zhang, L. Qiu, Y. Chen, J. Han. *Catal. Lett.*, 2024, **154**, 3574-3593.
23. A. D. McQueen, M. L. Ballentine, L. R. May, C. H. Laber, A. Das, M. J. Bortner, A. J. Kennedy. *ACS Environ. Sci. Technol. Water*, 2022, **2**, 137-147.
24. Z. H. Luo, C. L. Wei, N. N. He, Z. G. Sun, H. X. Li, D. Chen. *J. Nanomater*, 2015, 284834.
25. K. Sohara, K. Yamauchi, X. Sun, K. Misawa, Y. Sekine. *Catalysts*, 2021, **11**, 1-12.
26. P. Inphak, P. Kaewdee, C. Randorn, C. Thiraphatchotiphum, A. Asanakham, T. Kiatsiriroat, S. Tandorn. *Appl. Catal. B: Environ.*, 2026, **381**, 125825.
